# Supplementary material for: Independent and Combined Relationships of Perceived Neighborhood Social Cohesion and Physical Frailty on Functional Disability in Community-Dwelling Older Adults
Source: PubMed Central journal article supplement (PMC7460244; doi:10.3390/ijerph17165912), 2020-08-14
Supplement: ijerph-17-05912-s001.pdf [file ijerph-17-05912-s001.pdf]

| Supplemental Table: Associations with functional disability in logistic model |             |                   |       |
|-------------------------------------------------------------------------------|-------------|-------------------|-------|
| Variables                                                                     |             | OR (95% CI)       | p     |
| Frailty                                                                       | Robust      | 1                 |       |
|                                                                               | Pre-frail   | 2.30 (1.49,3.55)  | <.001 |
|                                                                               | Frail       | 5.33 (3.17, 8.96) | <.001 |
| PSC                                                                           | High level  |                   |       |
|                                                                               | Low level   | 1.71 (1.28, 2.27) | <.001 |
| Age                                                                           |             | 1.16 (1.12, 1.19) | <.001 |
| Female                                                                        |             | 0.96 (0.69, 1.32) | 0.787 |
| Educated >9 years                                                             |             | 1.16 (0.84,1.61)  | 0.371 |
| Marital status                                                                | Married     | 1                 |       |
|                                                                               | Unmarried   | 1.20 (0.87, 1.66) | 0.266 |
| Income monthly                                                                | <5000 Yuan  | 1                 |       |
|                                                                               | >=5000 Yuan | 0.93 (0.66,1.31)  | 0.677 |
| Hypertension                                                                  |             | 1.18 (0.87, 1.62) | 0.293 |
| Stroke                                                                        |             | 1.76 (1.06, 2.92) | 0.028 |
| Heart diseases                                                                |             | 1.38 (1.03, 1.86) | 0.033 |
| Diabetes mellitus                                                             |             | 0.80 (0.57, 1.13) | 0.213 |
| Urine incontinence                                                            |             | 1.35 (0.97, 1.88) | 0.073 |
| Chronic pain                                                                  |             | 1.38 (1.02, 1.86) | 0.009 |
| Visional impairment                                                           |             | 0.84 (0.58, 1.22) | 0.356 |
| Hearing impairment                                                            |             | 1.51 (1.11, 2.05) | 0.009 |
| Polypharmacy                                                                  |             | 0.92 (0.57, 1.47) | 0.727 |
| Hospitalization in past year                                                  |             | 1.83 (1.29, 2.60) | 0.001 |
| Falls in past year                                                            |             | 1.07 (0.70,1.65)  | 0.748 |
| Cognitive impairment                                                          |             | 1.59 (1.19, 2.11) | 0.002 |
| Depression                                                                    |             | 2.07 (1.50, 2.85) | <.001 |
